# Supplementary material for: Stereoselective synthesis of O-tosyl azabicyclic derivatives via aza Prins reaction of endocyclic N-acyliminium ions: application to the total synthesis of (±)-epi-indolizidine 167B and 209D
Source: Royal Society of Chemistry journal article supplement (doi:10.1039/c4ob01130a), 2014-01-01

## Supporting Information

**Stereoselective Synthesis of *O*-Tosyl Azabicyclic Derivatives via Aza Prins**

**Reaction of Endocyclic *N*-Acyliminium Ions: Application to the Total**

**Synthesis of ( $\pm$ )-*epi*-Indolizidine 167B and 209D**

*Kiran Indukuri, Jagadish Das and Anil K. Saikia\**

Department of chemistry, Indian Institute of Technology Guwahati, Guwahati 781039, India.

Fax:+91 3612690762, e-mail:asaikia@iitg.ernet.in

## HRMS Spectra

List of contents

- |                                 |               |
|---------------------------------|---------------|
| 1. HRMS Spectra of all products | <b>S2-S15</b> |
|---------------------------------|---------------|

## HRMS of compound **6a**

|               |         |             |    |                 |              |                        |                       |
|---------------|---------|-------------|----|-----------------|--------------|------------------------|-----------------------|
| Sample Name   | IK-T1   | Position    | -1 | Instrument Name | Instrument 1 | User Name              |                       |
| Inj Vol       | -10     | InjPosition |    | SampleType      | Sample       | IRM Calibration Status | Success               |
| Data Filename | IK-T1.d | ACQ Method  |    | Comment         |              | Acquired Time          | 2/13/2014 12:08:45 PM |

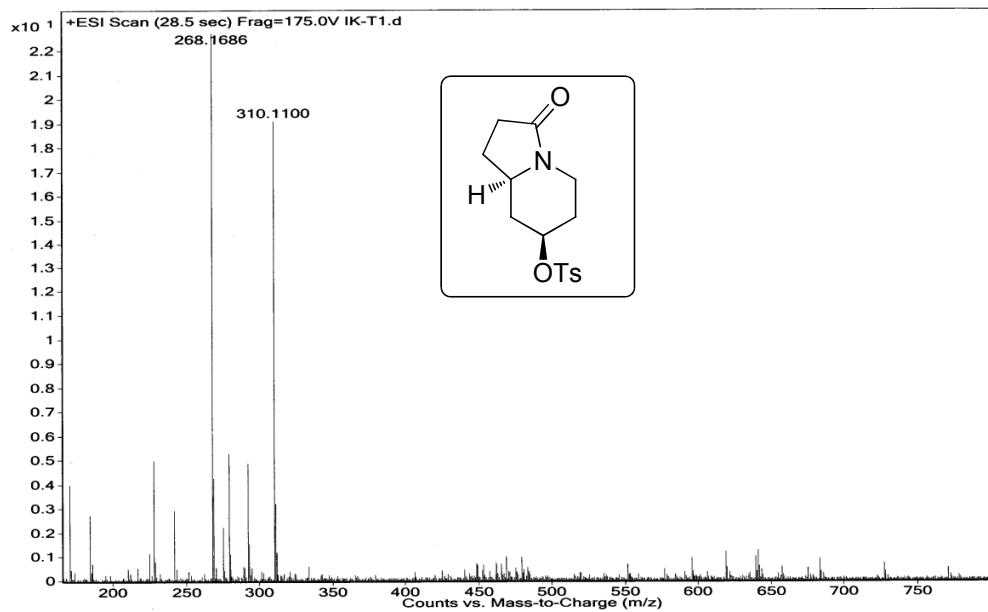

## HRMS of compound **6b**

|               |         |             |    |                 |              |                        |                       |
|---------------|---------|-------------|----|-----------------|--------------|------------------------|-----------------------|
| Sample Name   | IK-T3   | Position    | -1 | Instrument Name | Instrument 1 | User Name              |                       |
| Inj Vol       | -10     | InjPosition |    | SampleType      | Sample       | IRM Calibration Status | Success               |
| Data Filename | IK-T3.d | ACQ Method  |    | Comment         |              | Acquired Time          | 2/13/2014 11:57:17 AM |

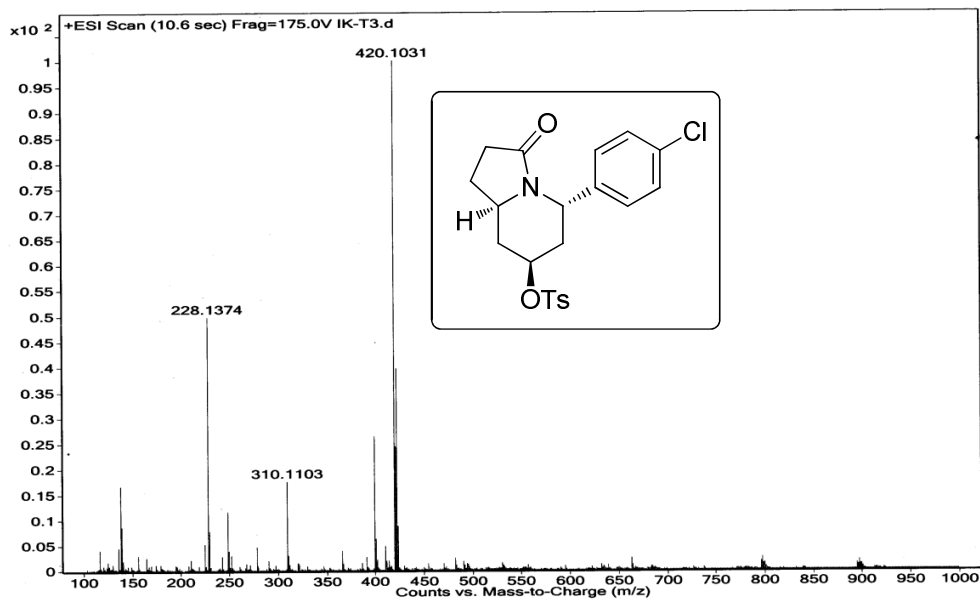

### HRMS of compound 6c

|               |           |             |    |                 |              |                        |                      |
|---------------|-----------|-------------|----|-----------------|--------------|------------------------|----------------------|
| Sample Name   | IK-TMBR   | Position    | -1 | Instrument Name | Instrument 1 | User Name              |                      |
| Inj Vol       | -10       | InjPosition |    | SampleType      | Sample       | IRM Calibration Status | Success              |
| Data Filename | IK-TMBR.d | ACQ Method  |    | Comment         |              | Acquired Time          | 4/11/2014 3:20:25 PM |

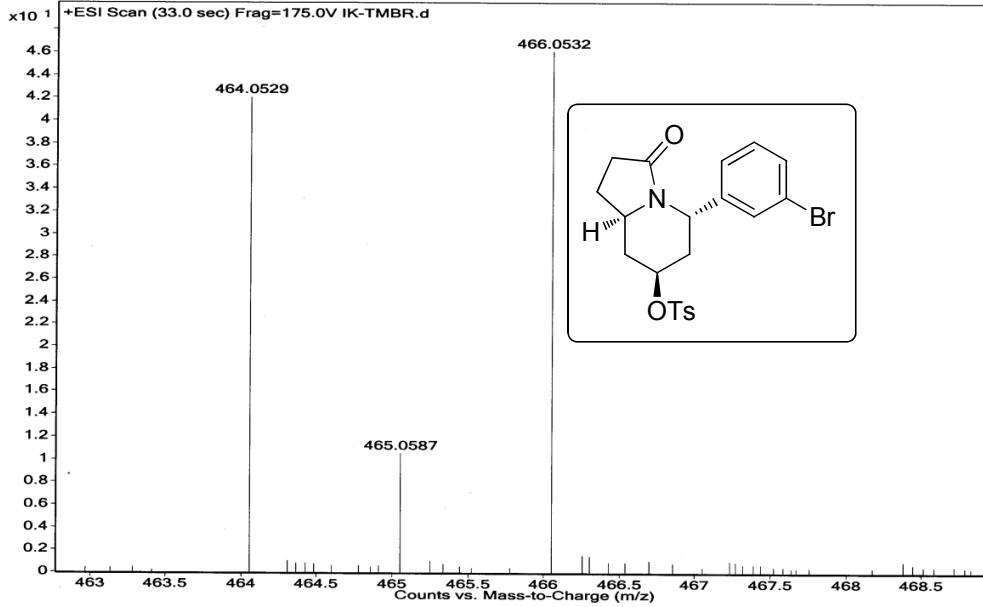

### HRMS of compound 6d

|               |         |             |    |                 |              |                        |                       |
|---------------|---------|-------------|----|-----------------|--------------|------------------------|-----------------------|
| Sample Name   | IK-T5   | Position    | -1 | Instrument Name | Instrument 1 | User Name              |                       |
| Inj Vol       | -10     | InjPosition |    | SampleType      | Sample       | IRM Calibration Status | Success               |
| Data Filename | IK-T5.d | ACQ Method  |    | Comment         |              | Acquired Time          | 2/13/2014 11:58:54 AM |

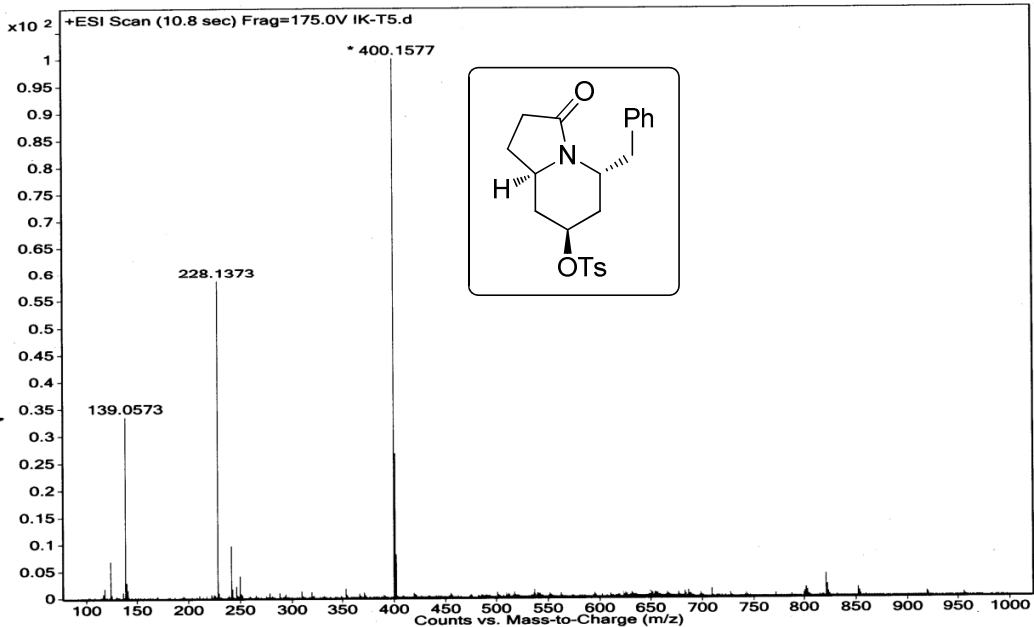

## HRMS of compound **6e**

|               |         |             |    |                 |              |                        |                       |
|---------------|---------|-------------|----|-----------------|--------------|------------------------|-----------------------|
| Sample Name   | IK-T2   | Position    | -1 | Instrument Name | Instrument 1 | User Name              |                       |
| Inj Vol       | -10     | InjPosition |    | SampleType      | Sample       | IRM Calibration Status | Success               |
| Data Filename | IK-T2.d | ACQ Method  |    | Comment         |              | Acquired Time          | 2/13/2014 11:55:30 AM |

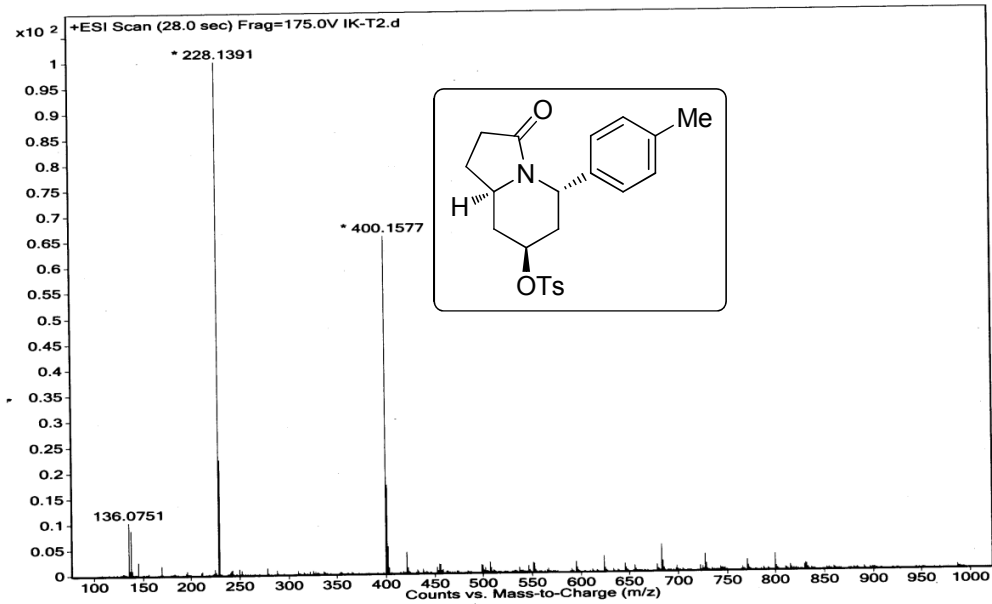

## HRMS of compound **6g**

|               |          |             |    |                 |              |                        |                       |
|---------------|----------|-------------|----|-----------------|--------------|------------------------|-----------------------|
| Sample Name   | IK-T10   | Position    | -1 | Instrument Name | Instrument 1 | User Name              |                       |
| Inj Vol       | -10      | InjPosition |    | SampleType      | Sample       | IRM Calibration Status | Success               |
| Data Filename | IK-T10.d | ACQ Method  |    | Comment         |              | Acquired Time          | 2/13/2014 12:07:12 PM |

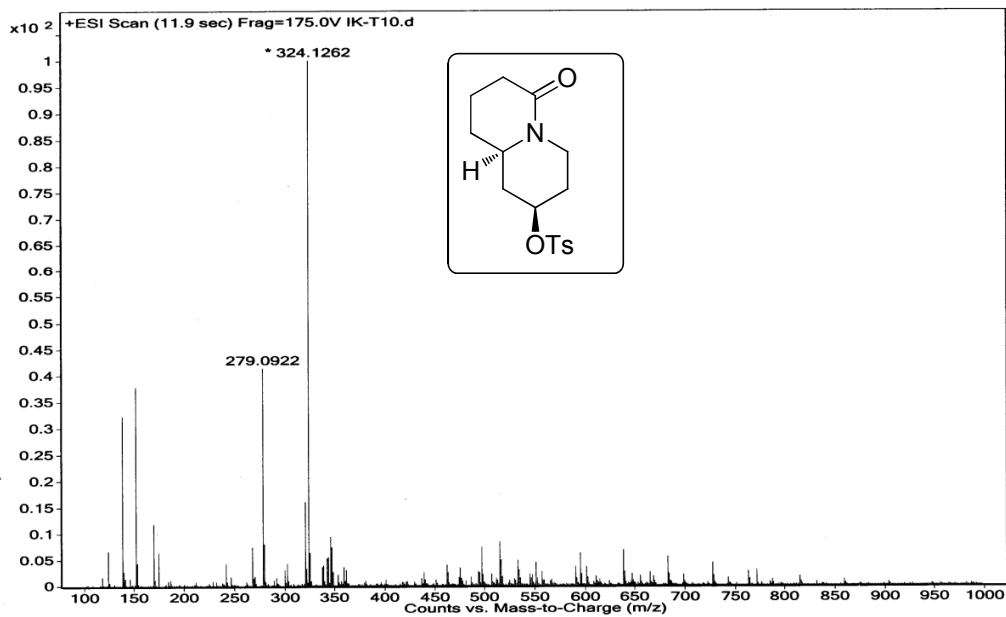

## HRMS of compound 6h

|               |           |             |    |                 |              |                        |                       |
|---------------|-----------|-------------|----|-----------------|--------------|------------------------|-----------------------|
| Sample Name   | IK-T-14   | Position    | -1 | Instrument Name | Instrument 1 | User Name              |                       |
| Inj Vol       | -10       | InjPosition |    | SampleType      | Sample       | IRM Calibration Status | Success               |
| Data Filename | IK-T-14.d | ACQ Method  |    | Comment         |              | Acquired Time          | 2/21/2014 11:49:42 AM |

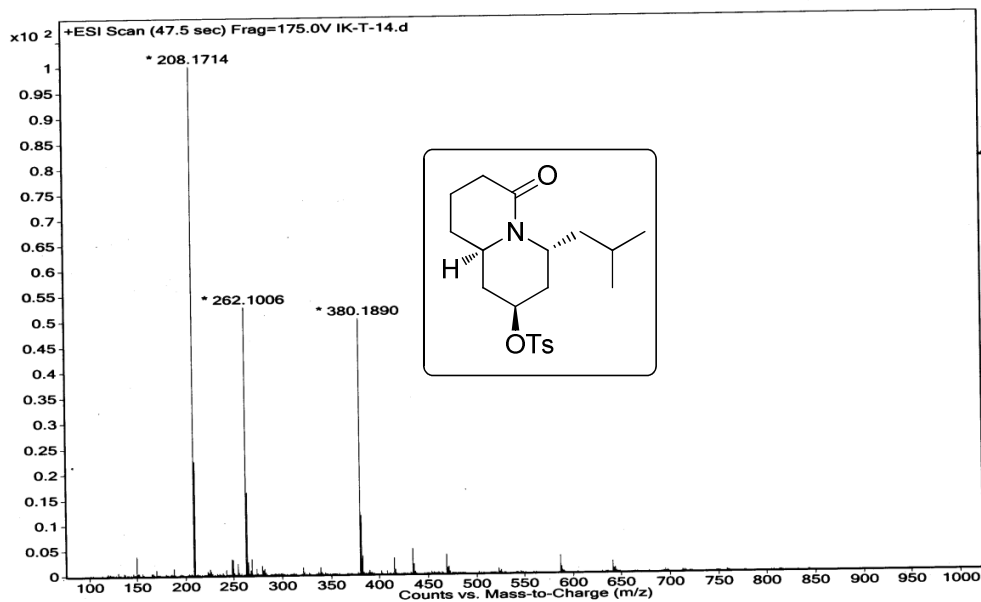

## HRMS of compound 6i

|               |           |             |    |                 |              |                        |                       |
|---------------|-----------|-------------|----|-----------------|--------------|------------------------|-----------------------|
| Sample Name   | IK-T-12   | Position    | -1 | Instrument Name | Instrument 1 | User Name              |                       |
| Inj Vol       | -10       | InjPosition |    | SampleType      | Sample       | IRM Calibration Status | Success               |
| Data Filename | IK-T-12.d | ACQ Method  |    | Comment         |              | Acquired Time          | 2/21/2014 11:46:56 AM |

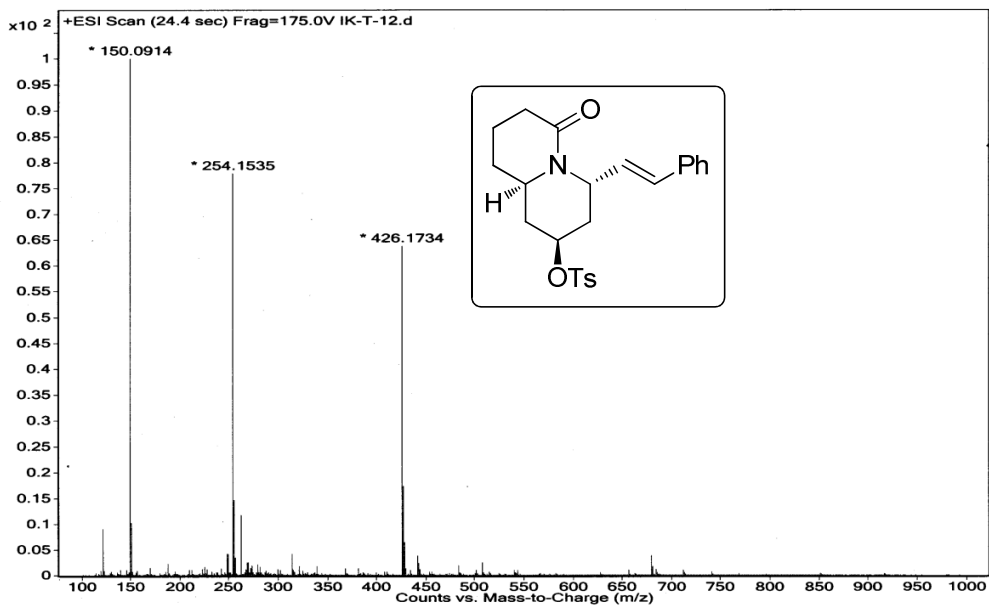

## HRMS of compound 6j

|               |           |             |    |                 |              |                        |                       |
|---------------|-----------|-------------|----|-----------------|--------------|------------------------|-----------------------|
| Sample Name   | IK-T-13   | Position    | -1 | Instrument Name | Instrument 1 | User Name              |                       |
| Inj Vol       | -10       | InjPosition |    | SampleType      | Sample       | IRM Calibration Status | Success               |
| Data Filename | IK-T-13.d | ACQ Method  |    | Comment         |              | Acquired Time          | 2/21/2014 11:48:17 AM |

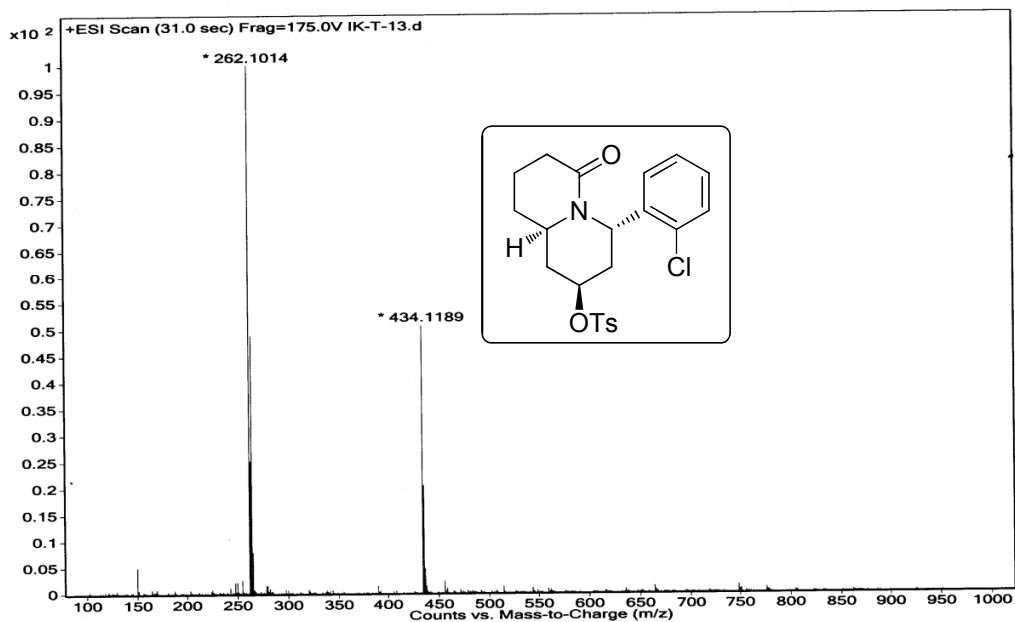

## HRMS of compound 6k

|               |         |             |    |                 |              |                        |                       |
|---------------|---------|-------------|----|-----------------|--------------|------------------------|-----------------------|
| Sample Name   | IK-T7   | Position    | -1 | Instrument Name | Instrument 1 | User Name              |                       |
| Inj Vol       | -10     | InjPosition |    | SampleType      | Sample       | IRM Calibration Status | Success               |
| Data Filename | IK-T7.d | ACQ Method  |    | Comment         |              | Acquired Time          | 2/13/2014 12:02:13 PM |

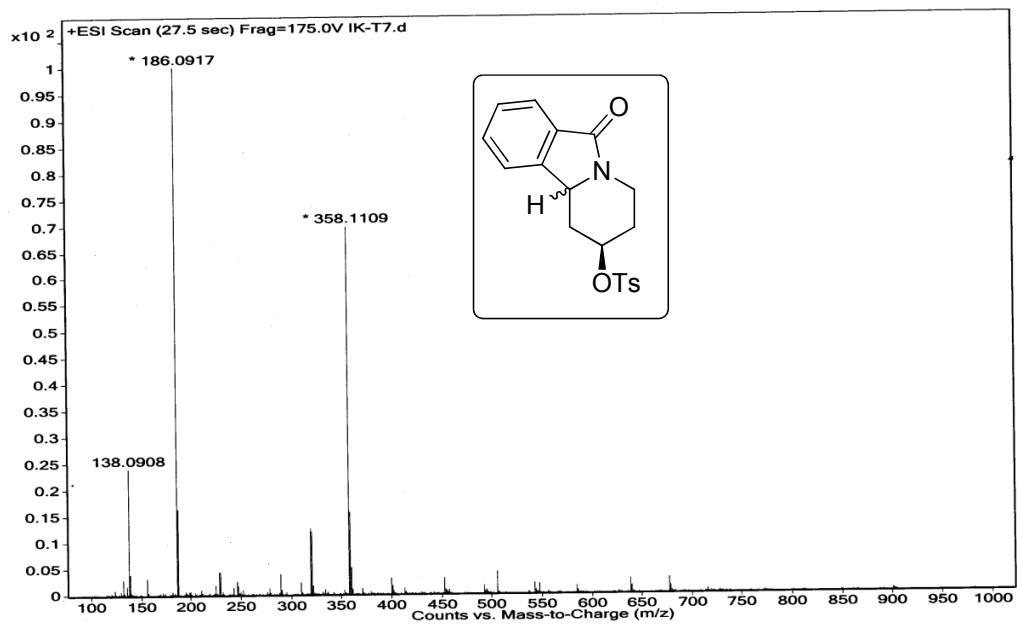

## HRMS of compound 6l

|               |         |             |    |                 |              |                        |                       |
|---------------|---------|-------------|----|-----------------|--------------|------------------------|-----------------------|
| Sample Name   | IK-T6   | Position    | -1 | Instrument Name | Instrument 1 | User Name              |                       |
| Inj Vol       | -10     | InjPosition |    | SampleType      | Sample       | IRM Calibration Status | Success               |
| Data Filename | IK-T6.d | ACQ Method  |    | Comment         |              | Acquired Time          | 2/13/2014 12:00:34 PM |

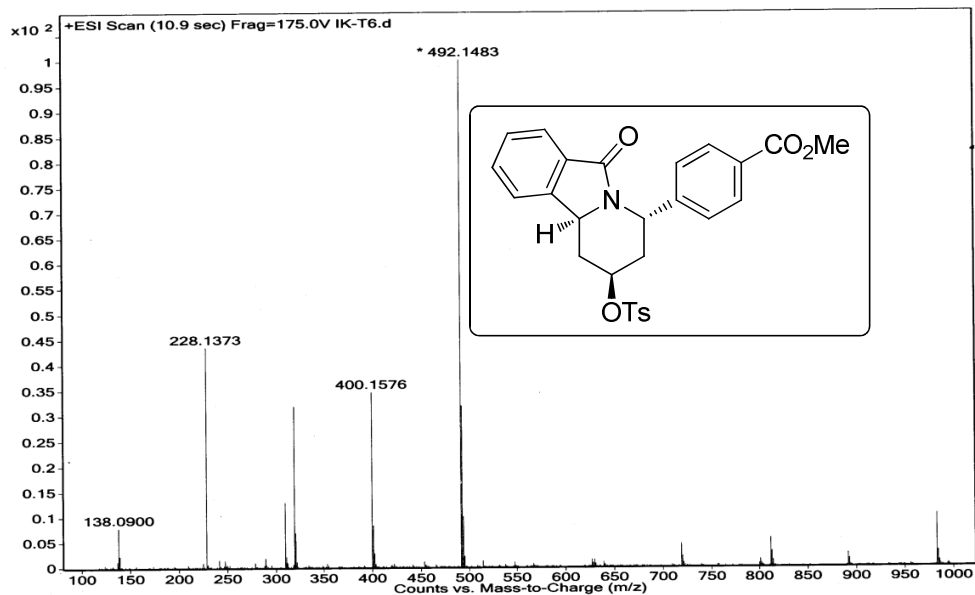

## HRMS of compound 6m

|               |           |             |    |                 |              |                        |                       |
|---------------|-----------|-------------|----|-----------------|--------------|------------------------|-----------------------|
| Sample Name   | IK-T-11   | Position    | -1 | Instrument Name | Instrument 1 | User Name              |                       |
| Inj Vol       | -10       | InjPosition |    | SampleType      | Sample       | IRM Calibration Status | Success               |
| Data Filename | IK-T-11.d | ACQ Method  |    | Comment         |              | Acquired Time          | 2/21/2014 11:45:32 AM |

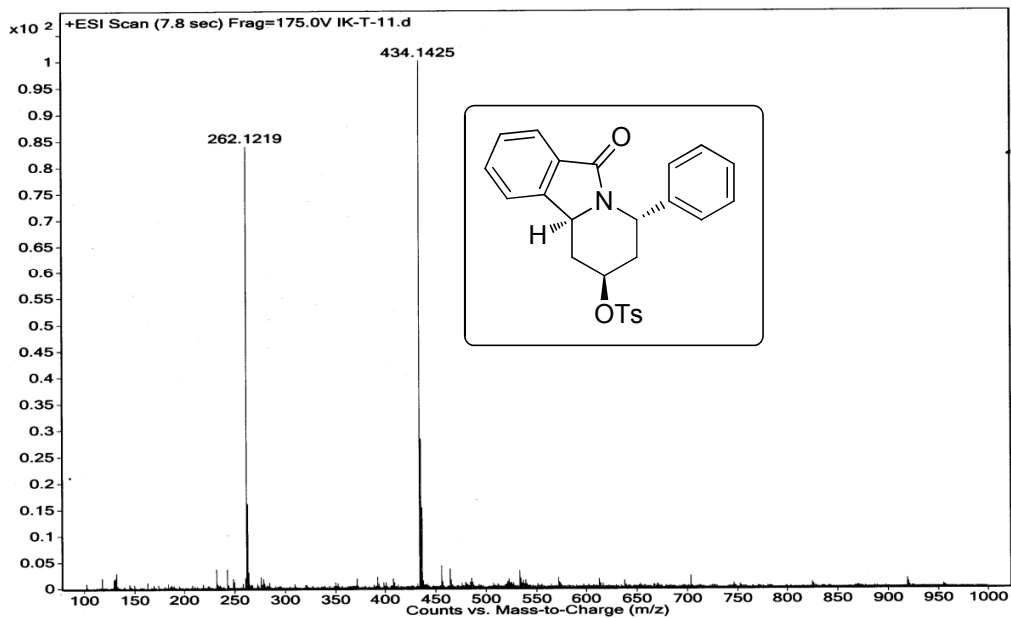

## HRMS of compound 6n

|                              |                    |                                     |                                            |
|------------------------------|--------------------|-------------------------------------|--------------------------------------------|
| <b>Sample Name</b> IK-T9     | <b>Position</b> -1 | <b>Instrument Name</b> Instrument 1 | <b>User Name</b>                           |
| <b>Inj Vol</b> -10           | <b>InjPosition</b> | <b>SampleType</b> Sample            | <b>IRM Calibration Status</b> Success      |
| <b>Data Filename</b> IK-T9.d | <b>ACQ Method</b>  | <b>Comment</b>                      | <b>Acquired Time</b> 2/13/2014 12:05:38 PM |

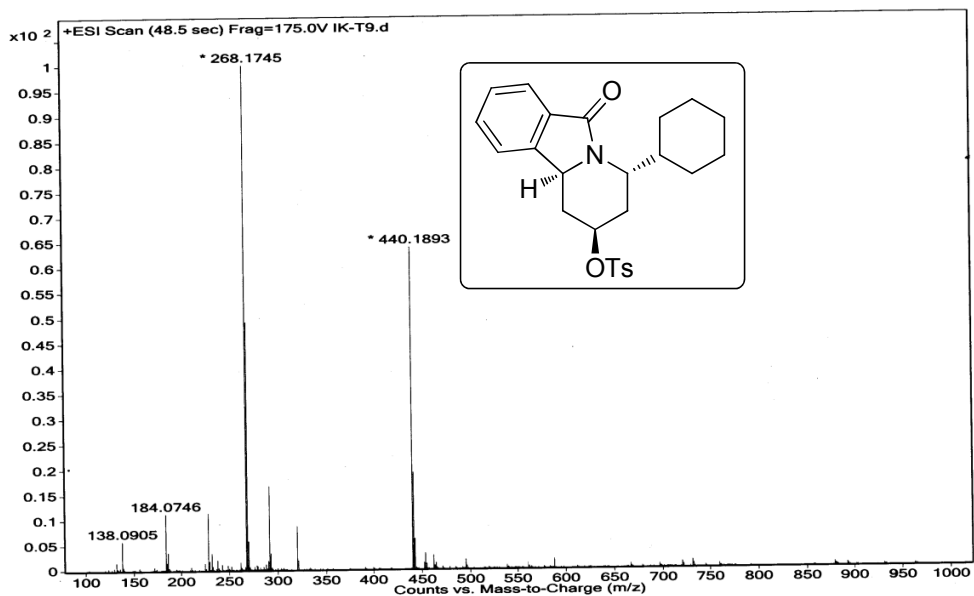

## HRMS of compound 6o

|                              |                    |                                     |                                            |
|------------------------------|--------------------|-------------------------------------|--------------------------------------------|
| <b>Sample Name</b> IK-T8     | <b>Position</b> -1 | <b>Instrument Name</b> Instrument 1 | <b>User Name</b>                           |
| <b>Inj Vol</b> -10           | <b>InjPosition</b> | <b>SampleType</b> Sample            | <b>IRM Calibration Status</b> Success      |
| <b>Data Filename</b> IK-T8.d | <b>ACQ Method</b>  | <b>Comment</b>                      | <b>Acquired Time</b> 2/13/2014 12:03:53 PM |

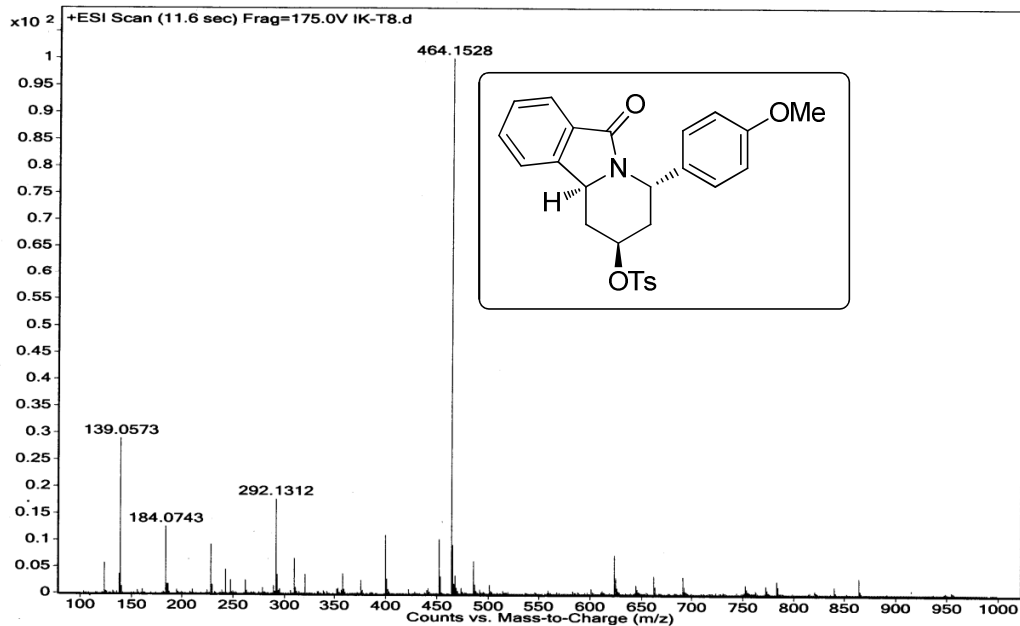



## HRMS of compound 6d'

|               |            |             |    |                 |              |                        |                      |
|---------------|------------|-------------|----|-----------------|--------------|------------------------|----------------------|
| Sample Name   | IK-BN-OH   | Position    | -1 | Instrument Name | Instrument 1 | User Name              |                      |
| Inj Vol       | -10        | InjPosition |    | SampleType      | Sample       | IRM Calibration Status | Success              |
| Data Filename | IK-BN-OH.d | ACQ Method  |    | Comment         |              | Acquired Time          | 4/29/2014 3:33:05 PM |

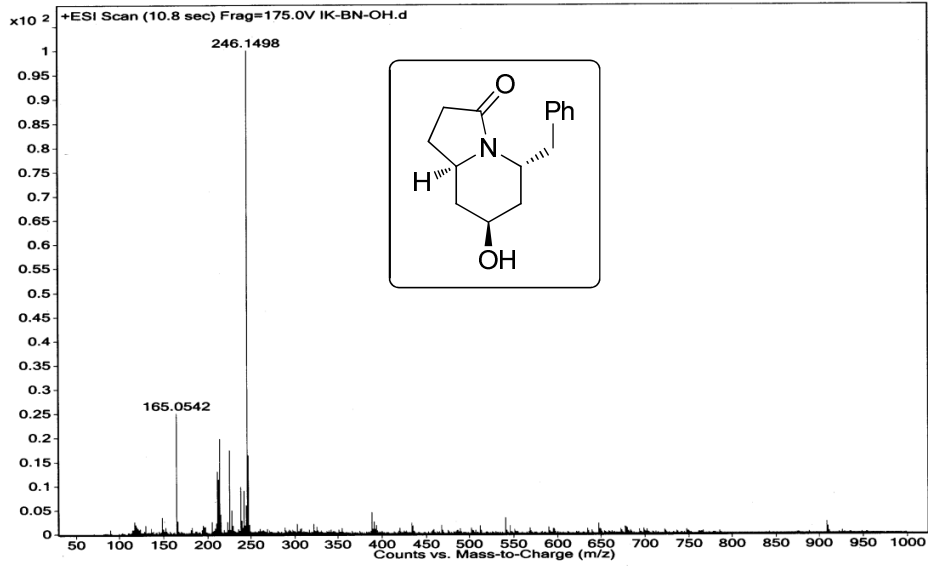

## HRMS of compound 9p

|               |           |             |    |                 |              |                        |                      |
|---------------|-----------|-------------|----|-----------------|--------------|------------------------|----------------------|
| Sample Name   | IK-T-1A   | Position    | -1 | Instrument Name | Instrument 1 | User Name              |                      |
| Inj Vol       | -10       | InjPosition |    | SampleType      | Sample       | IRM Calibration Status | Success              |
| Data Filename | IK-T-1A.d | ACQ Method  |    | Comment         |              | Acquired Time          | 2/24/2014 3:59:55 PM |

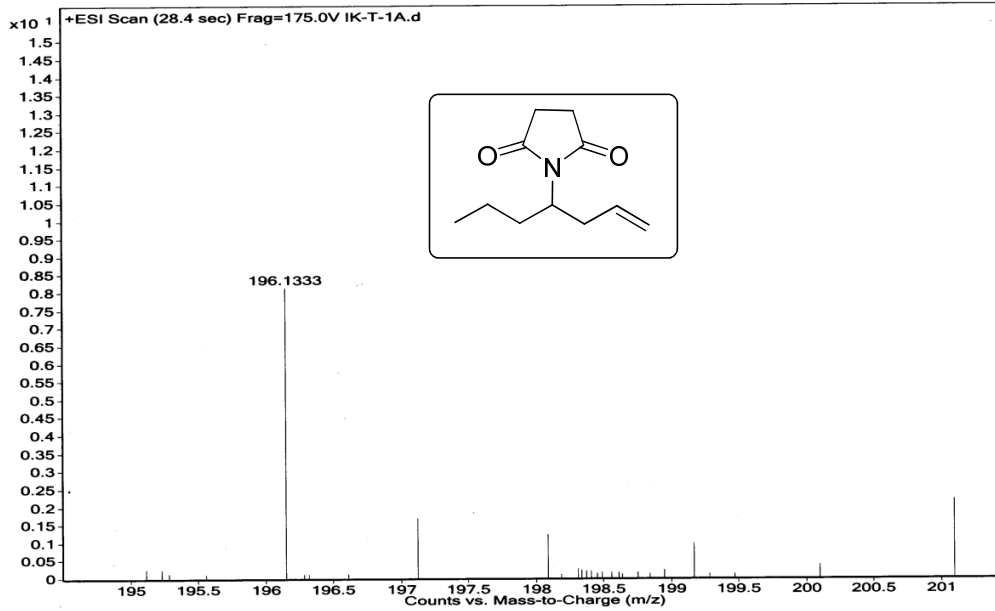

## HRMS of compound 9q

|               |          |             |    |                 |              |                        |                       |
|---------------|----------|-------------|----|-----------------|--------------|------------------------|-----------------------|
| Sample Name   | IK-A11   | Position    | -1 | Instrument Name | Instrument 1 | User Name              |                       |
| Inj Vol       | -10      | InjPosition |    | SampleType      | Sample       | IRM Calibration Status | Success               |
| Data Filename | IK-A11.d | ACQ Method  |    | Comment         |              | Acquired Time          | 4/17/2014 12:25:44 PM |

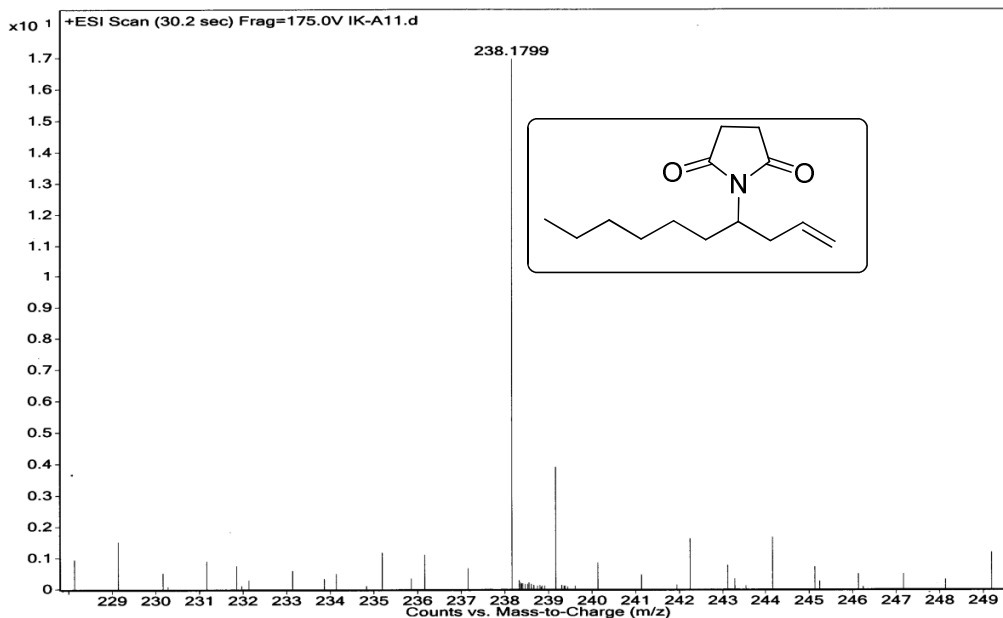

## HRMS of compound 5p

|               |           |             |    |                 |              |                        |                      |
|---------------|-----------|-------------|----|-----------------|--------------|------------------------|----------------------|
| Sample Name   | IK-T-1B   | Position    | -1 | Instrument Name | Instrument 1 | User Name              |                      |
| Inj Vol       | -10       | InjPosition |    | SampleType      | Sample       | IRM Calibration Status | Success              |
| Data Filename | IK-T-1B.d | ACQ Method  |    | Comment         |              | Acquired Time          | 2/24/2014 4:01:28 PM |

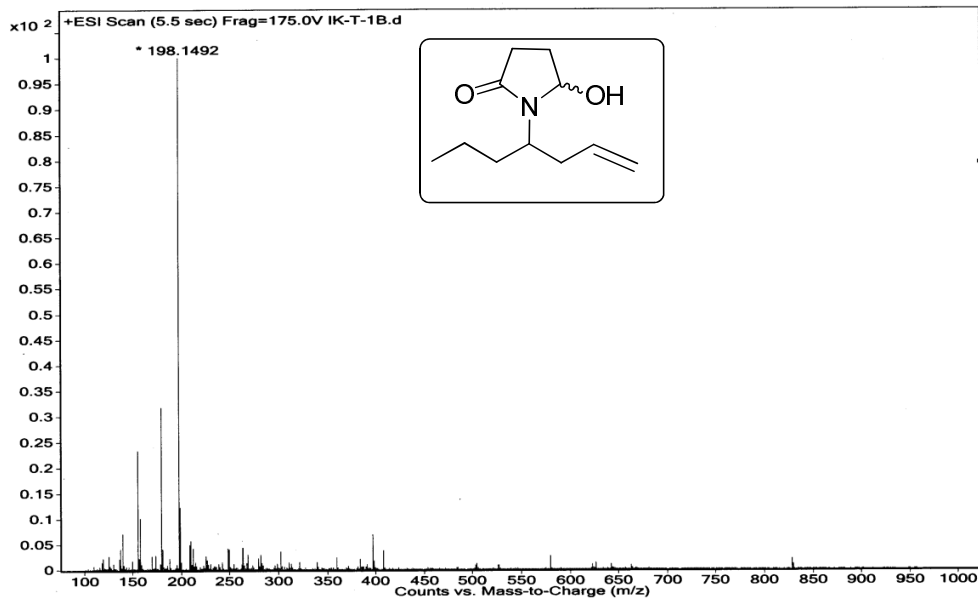

## HRMS of compound 5q

|               |           |             |    |                 |              |                        |                      |
|---------------|-----------|-------------|----|-----------------|--------------|------------------------|----------------------|
| Sample Name   | IK-T-2B   | Position    | -1 | Instrument Name | Instrument 1 | User Name              |                      |
| Inj Vol       | -10       | InjPosition |    | SampleType      | Sample       | IRM Calibration Status | Success              |
| Data Filename | IK-T-2B.d | ACQ Method  |    | Comment         |              | Acquired Time          | 2/24/2014 4:06:38 PM |

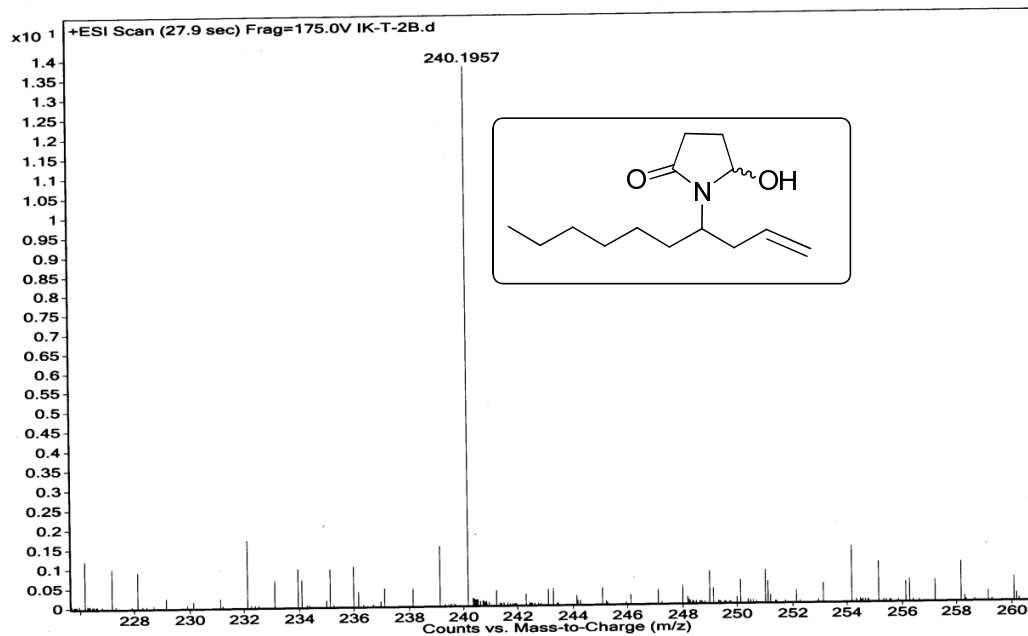

## HRMS of compound 6p

|               |           |             |    |                 |              |                        |                      |
|---------------|-----------|-------------|----|-----------------|--------------|------------------------|----------------------|
| Sample Name   | IK-T-1C   | Position    | -1 | Instrument Name | Instrument 1 | User Name              |                      |
| Inj Vol       | -10       | InjPosition |    | SampleType      | Sample       | IRM Calibration Status | Success              |
| Data Filename | IK-T-1C.d | ACQ Method  |    | Comment         |              | Acquired Time          | 2/24/2014 4:02:51 PM |

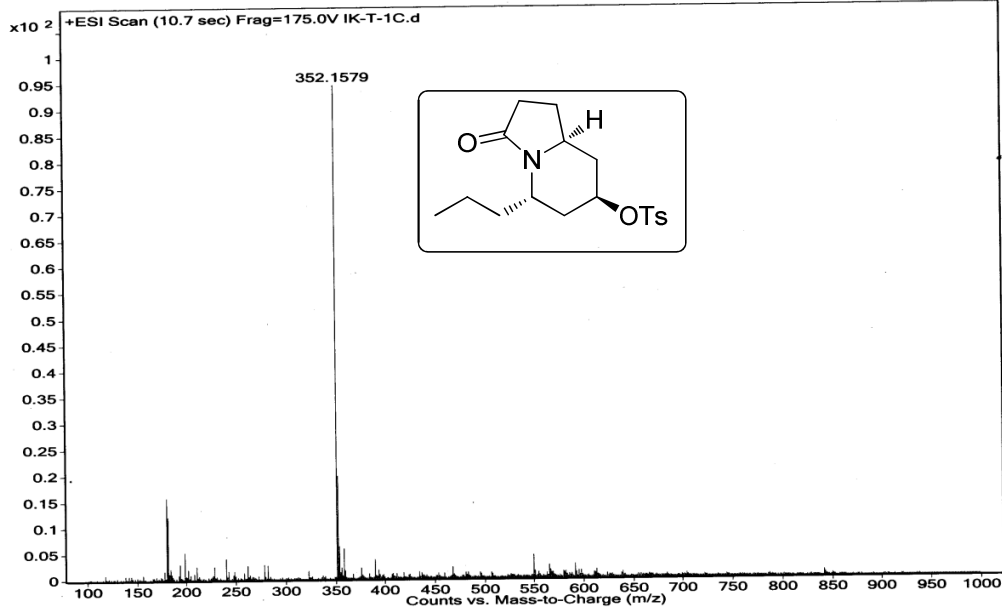

## HRMS of compound 6q

|               |           |             |    |                 |              |                        |                      |
|---------------|-----------|-------------|----|-----------------|--------------|------------------------|----------------------|
| Sample Name   | IK-T-2C   | Position    | -1 | Instrument Name | Instrument 1 | User Name              |                      |
| Inj Vol       | -10       | InjPosition |    | SampleType      | Sample       | IRM Calibration Status | Success              |
| Data Filename | IK-T-2C.d | ACQ Method  |    | Comment         |              | Acquired Time          | 2/24/2014 4:08:11 PM |

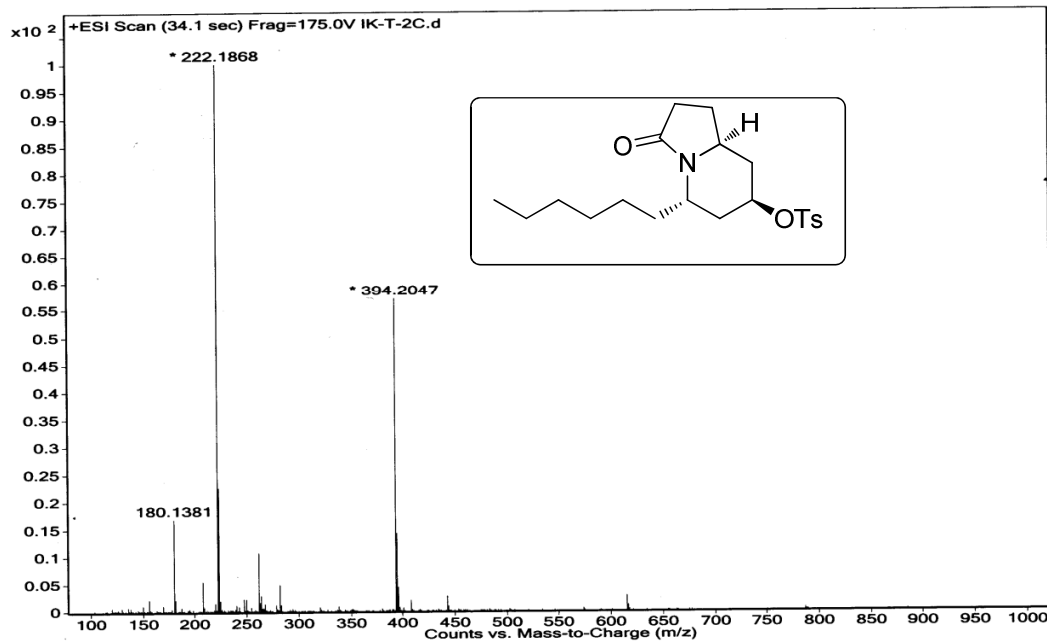

## HRMS of compound 10p

|               |           |             |    |                 |              |                        |                      |
|---------------|-----------|-------------|----|-----------------|--------------|------------------------|----------------------|
| Sample Name   | IK-T-1D   | Position    | -1 | Instrument Name | Instrument 1 | User Name              |                      |
| Inj Vol       | -10       | InjPosition |    | SampleType      | Sample       | IRM Calibration Status | Success              |
| Data Filename | IK-T-1D.d | ACQ Method  |    | Comment         |              | Acquired Time          | 2/24/2014 4:09:55 PM |

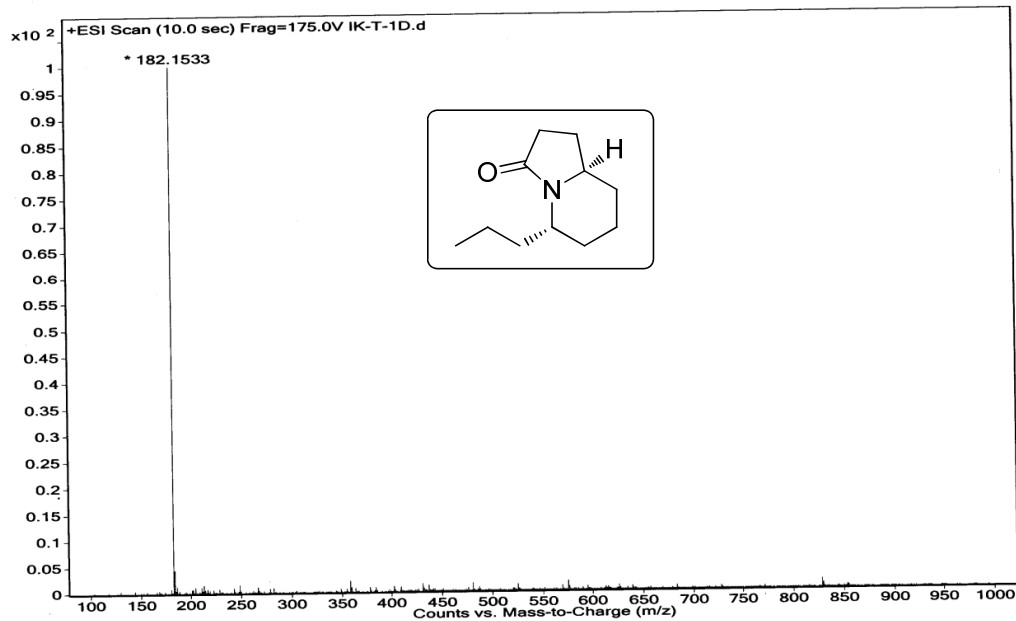

## HRMS of compound 10q

|               |                |             |    |                 |              |                        |                       |
|---------------|----------------|-------------|----|-----------------|--------------|------------------------|-----------------------|
| Sample Name   | IK-T-HEPTYLE   | Position    | -1 | Instrument Name | Instrument 1 | User Name              |                       |
| Inj Vol       | -10            | InjPosition |    | SampleType      | Sample       | IRM Calibration Status | Success               |
| Data Filename | IK-T-HEPTYLE.d | ACQ Method  |    | Comment         |              | Acquired Time          | 3/28/2014 11:35:50 AM |

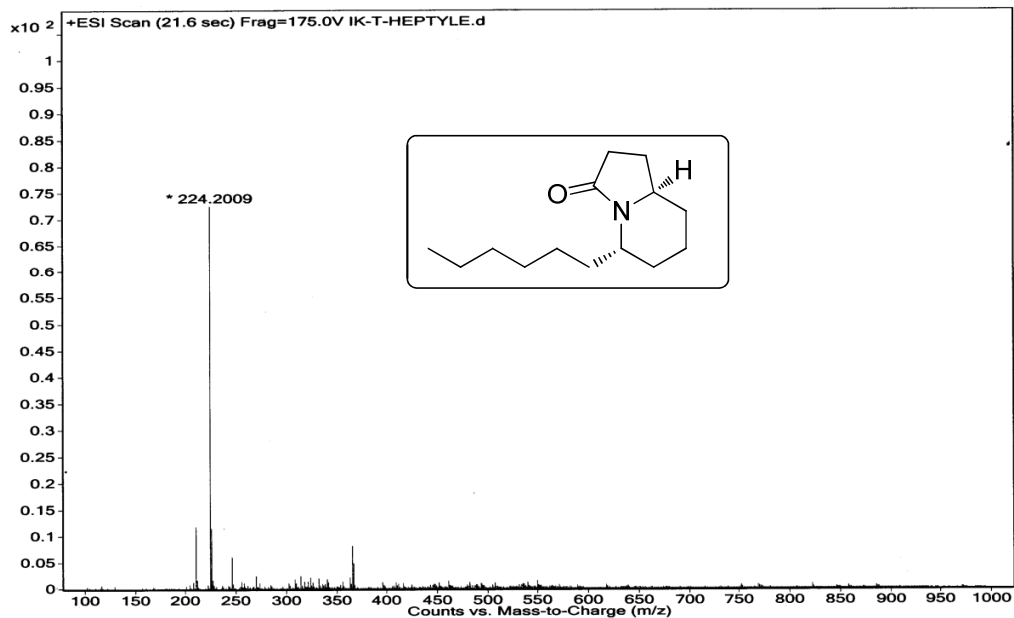

## HRMS of compound epi-3p

|               |            |             |    |                 |              |                        |                       |
|---------------|------------|-------------|----|-----------------|--------------|------------------------|-----------------------|
| Sample Name   | IK-BUTYL   | Position    | -1 | Instrument Name | Instrument 1 | User Name              |                       |
| Inj Vol       | -10        | InjPosition |    | SampleType      | Sample       | IRM Calibration Status | Success               |
| Data Filename | IK-BUTYL.d | ACQ Method  |    | Comment         |              | Acquired Time          | 3/28/2014 11:41:08 AM |

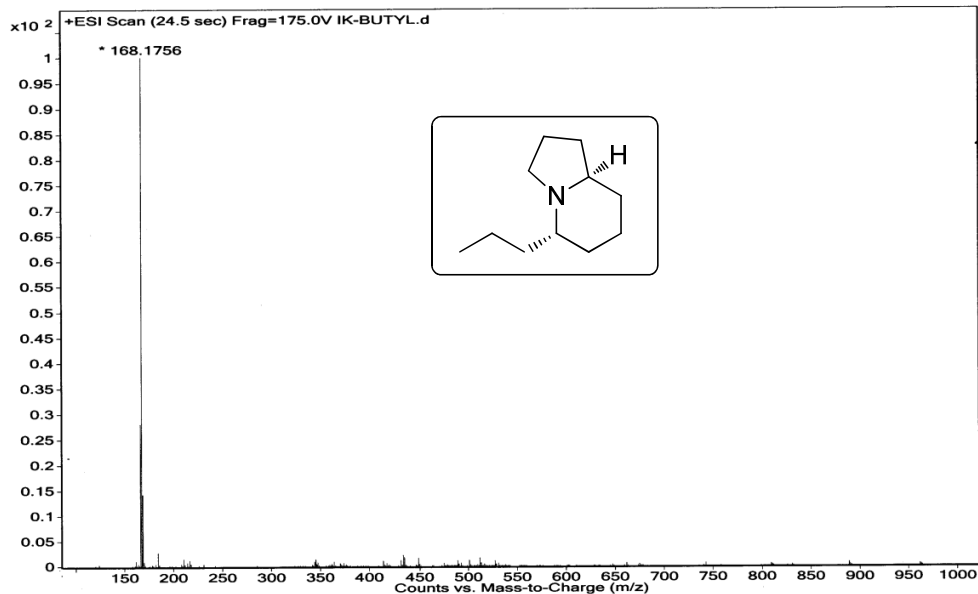

## HRMS of compound *epi-3q*

|               |              |             |    |                 |              |                        |                       |
|---------------|--------------|-------------|----|-----------------|--------------|------------------------|-----------------------|
| Sample Name   | IK-HEPTYLE   | Position    | -1 | Instrument Name | Instrument 1 | User Name              |                       |
| Inj Vol       | -10          | InjPosition |    | SampleType      | Sample       | IRM Calibration Status | Success               |
| Data Filename | IK-HEPTYLE.d | ACQ Method  |    | Comment         |              | Acquired Time          | 3/28/2014 11:38:02 AM |

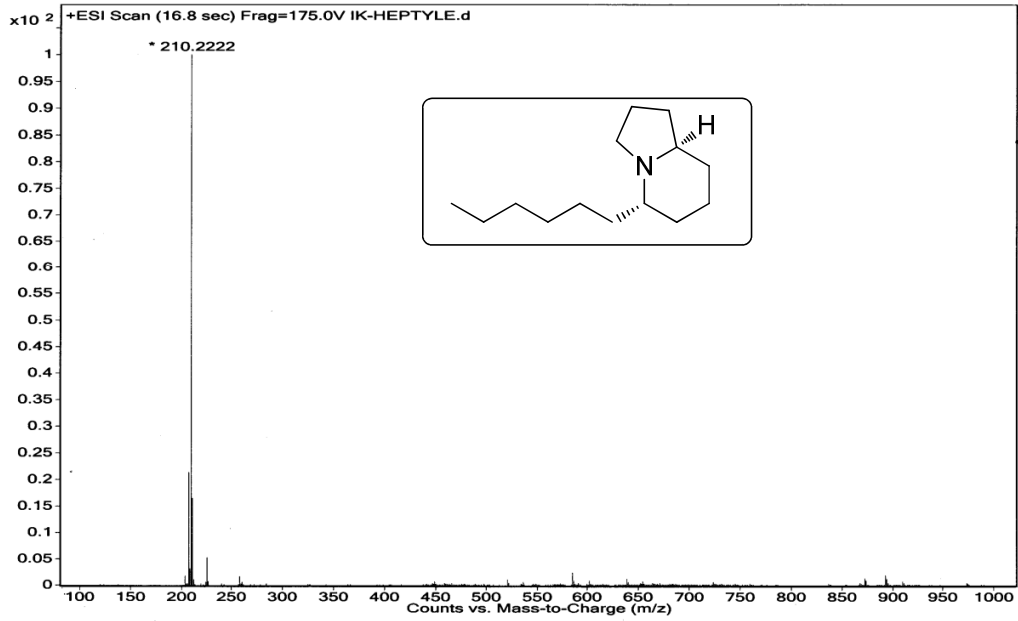

## HRMS of compound 11

|               |            |             |    |                 |              |                        |                       |
|---------------|------------|-------------|----|-----------------|--------------|------------------------|-----------------------|
| Sample Name   | IK-LAH-L   | Position    | -1 | Instrument Name | Instrument 1 | User Name              |                       |
| Inj Vol       | -10        | InjPosition |    | SampleType      | Sample       | IRM Calibration Status | Success               |
| Data Filename | IK-LAH-L.d | ACQ Method  |    | Comment         |              | Acquired Time          | 3/28/2014 11:25:24 AM |

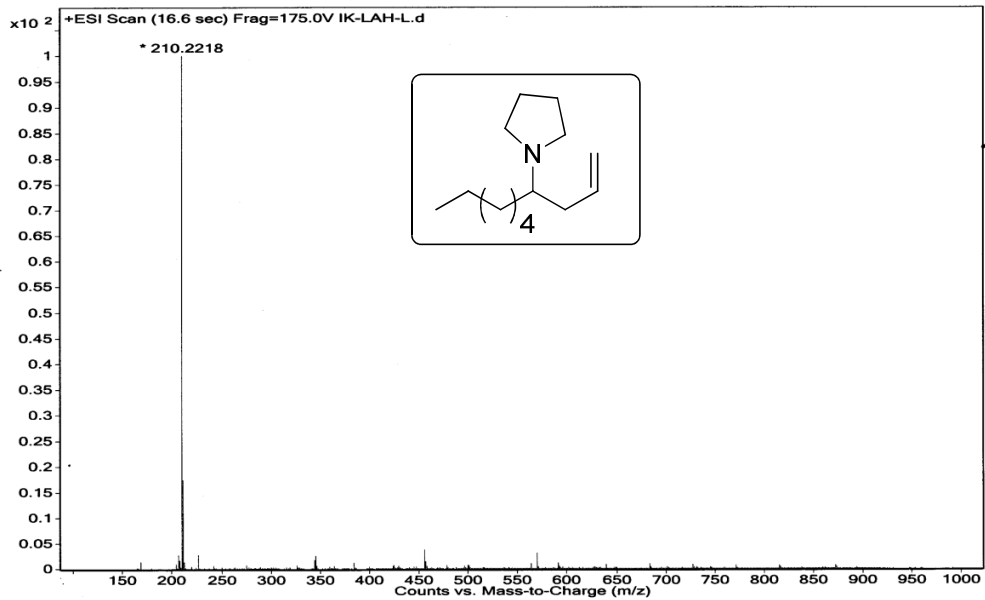

# HRMS of compound 12

|               |            |             |    |                 |              |                        |                       |
|---------------|------------|-------------|----|-----------------|--------------|------------------------|-----------------------|
| Sample Name   | IK-LAH-U   | Position    | -1 | Instrument Name | Instrument 1 | User Name              |                       |
| Inj Vol       | -10        | InjPosition |    | SampleType      | Sample       | IRM Calibration Status | Success               |
| Data Filename | IK-LAH-U.d | ACQ Method  |    | Comment         |              | Acquired Time          | 3/28/2014 11:42:42 AM |

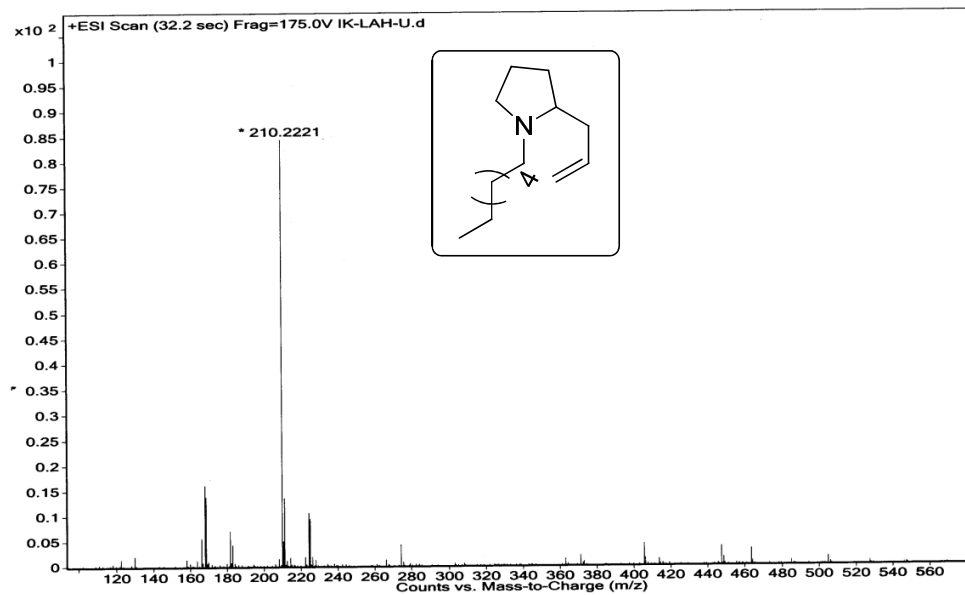

Supplement: c4ob01130a1.pdf [file c4ob01130a1.pdf]
